# Supplementary material for: Trimerization of the N-Terminal Tail of Zika Virus NS4A Protein: A Potential In Vitro Antiviral Screening Assay
Source: MDPI journal article supplement (doi:10.3390/membranes11050335), 2021-04-30
Supplement: s1 [file s1]

Supplementary Material

# Trimerization of the N-terminal tail of Zika virus NS4A protein: a potential *in vitro* antiviral screening assay.

Janet To and Jaume Torres \*

School of Biological Sciences, Nanyang Technological University, 60 Nanyang Drive, Singapore 637551;  
janetto@ntu.edu.sg

\* Correspondence: jtorres@ntu.edu.sg

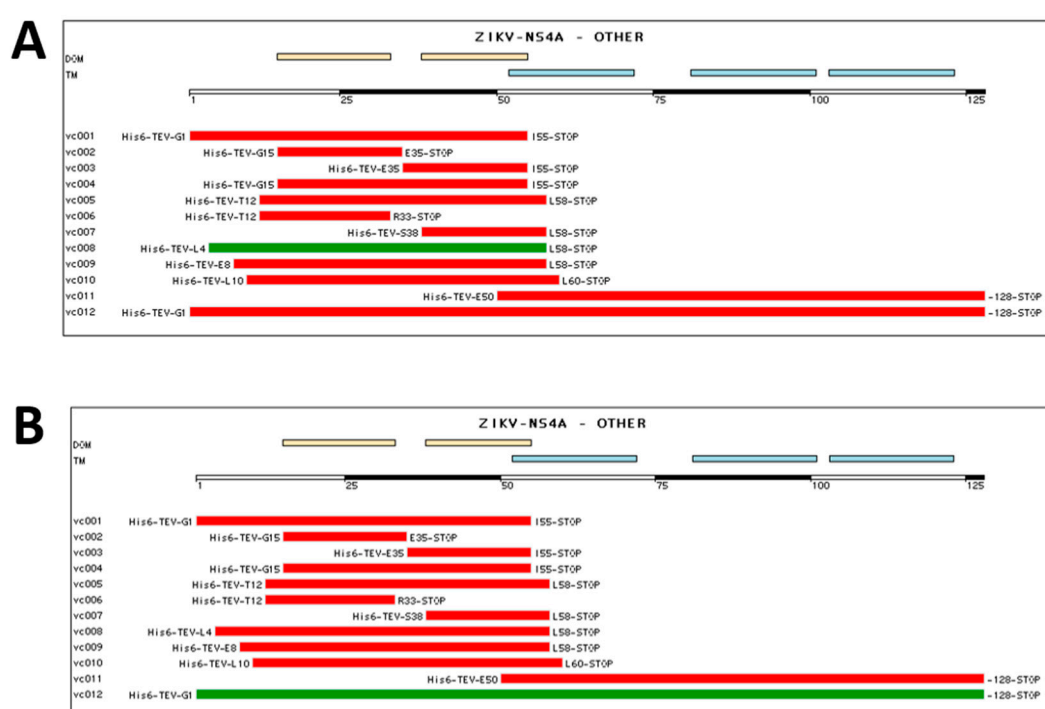

**Figure S1.** Aqueous-soluble (A) and total (B) expression of ZIKV NS4A constructs preceded by a TEV protease cleavage site and an N-terminal hexa-histidine affinity tag tested in the NTU Protein Production Platform (NTU PPP, Singapore) for expression screening in BL21(DE3) Rosetta T1R *E. coli* bacteria. Constructs were designed to cover different lengths of the NS4A N-terminal extramembrane domain, the three predicted transmembrane domains and the full-length protein. Only one construct (residues 4-58) (A, green bar) and the full-length protein (B, green bar) could be successfully expressed and extracted in the presence of detergents, while all other constructs (red bars) failed to express significantly.
